# Supplementary material
Source: HighWire-hosted journal article supplement (http://www.jrheum.org/highwire/filestream/29675/field_highwire_adjunct_files/0/140476DataSuppl.pdf)
Supplement: 140476DataSuppl.pdf [file 140476DataSuppl.pdf]

Supplement 1. ICPC codes of chronic diseases.

| ICPC Code | Diagnosis                              | Combined into a Diagnostic Cluster<br>(See Also Supplement 2) |
|-----------|----------------------------------------|---------------------------------------------------------------|
| A70       | Tuberculosis                           |                                                               |
| A79       | Malignancy NOS                         | Cancer                                                        |
| A90       | Congenital anomaly OS/multiple         | Congenital diseases                                           |
| B72       | Hodgkin's disease/lymphoma             | Cancer                                                        |
| B73       | Leukaemia                              | Cancer                                                        |
| B74       | Malignant neoplasm blood other         | Cancer                                                        |
| B78       | Hereditary haemolytic anaemia          |                                                               |
| B81       | Anaemia, Vitamin B12/folate deficiency | Anaemia                                                       |
| B82       | Anaemia other/unspecified              | Anaemia                                                       |
| B83       | Purpura coagulation defects            |                                                               |
| B90       | HIV infection AIDS                     |                                                               |
| D74       | Malignant neoplasm stomach             | Cancer                                                        |
| D75       | Malignant neoplasm colon/rectum        | Cancer                                                        |
| D76       | Malignant neoplasm pancreas            | Cancer                                                        |
| D77       | Malig. neoplasm digest other/NOS       | Cancer                                                        |
| D84       | Oesophagus disease                     | Congenital diseases                                           |
| D85       | Duodenal ulcer                         | Ulcer                                                         |
| D86       | Peptic ulcer other                     | Ulcer                                                         |
| D92       | Diverticular disease                   |                                                               |
| D93       | Irritable bowel syndrome               |                                                               |
| D94       | Chronic enteritis ulcerative colitis   |                                                               |
| D97       | Cirrhosis Liver disease NOS            |                                                               |
| D98       | Cholecystitis cholelithiasis           |                                                               |
| F83       | Retinopathy                            | Visual impairment                                             |
| F84       | Macular degeneration                   | Visual impairment                                             |
| F92       | Cataract                               | Visual impairment                                             |
| F93       | Glaucoma                               | Visual impairment                                             |
| F94       | Blindness                              | Visual impairment                                             |
| H82       | Vertiginous syndrome                   |                                                               |
| H84       | Presbycusis                            | Hearing impairment                                            |
| H85       | Acoustic trauma                        | Hearing impairment                                            |
| H86       | Deafness                               | Hearing impairment                                            |
| K73       | Congenital anomaly cardiovascular      | Congenital diseases                                           |
| K74       | Ischemic heart disease with angina     | Ischaemic heart disease                                       |
| K75       | Acute myocardial infarction            | Ischaemic heart disease                                       |
| K76       | Ischemic heart disease without angina  | Ischaemic heart disease                                       |
| K77       | Heart failure                          |                                                               |
| K78       | Atrial fibrillation flutter            |                                                               |
| K79       | Paroxysmal tachycardia                 |                                                               |
| K80       | Cardiac arrhythmia NOS                 |                                                               |
| K81       | Heart arterial murmur NOS              |                                                               |
| K82       | Pulmonary heart disease                |                                                               |
| K83       | Heart valve disease NOS                |                                                               |
| K84       | Heart disease other                    |                                                               |
| K86       | Hypertension uncomplicated             | Hypertension                                                  |
| K87       | Hypertension complicated               | Hypertension                                                  |
| K88       | Postural hypotension                   |                                                               |
| K89       | Transient cerebral ischaemia           | Stroke                                                        |
| K90       | Stroke/ cerebrovascular accident       | Stroke                                                        |
| K91       | Atherosclerosis                        |                                                               |

|     |                                                 |                     |
|-----|-------------------------------------------------|---------------------|
| K92 | Peripheral vascular disease                     |                     |
| K93 | Pulmonary embolism                              |                     |
| K94 | Phlebitis thrombophlebitis                      |                     |
| K95 | Varicose veins of leg                           |                     |
| L71 | Malignant neoplasm musculoskeletal              | Cancer              |
| L83 | Neck syndrome                                   | Spinal cord         |
| L84 | Back syndrome w/o radiating pain                | Spinal cord         |
| L85 | Acquired deformity of spine                     | Spinal cord         |
| L86 | Back syndrome with radiating pain               | Spinal cord         |
| L88 | Rheumatoid arthritis and related diseases       | (cases)             |
| L89 | Osteoarthritis of hip                           | Osteoarthritis      |
| L90 | Osteoarthritis of knee                          | Osteoarthritis      |
| L91 | Osteoarthritis other                            | Osteoarthritis      |
| L92 | Shoulder syndrome                               |                     |
| L93 | Tennis elbow                                    |                     |
| L95 | Osteoporosis                                    |                     |
| N73 | Neurological infection other                    |                     |
| N74 | Malignant neoplasm nervous system               | Cancer              |
| N75 | Benign neoplasm nervous system                  |                     |
| N76 | Neoplasm nervous system unspecified             | Congenital diseases |
| N85 | Congenital anomaly neurological                 | Congenital diseases |
| N86 | Multiple sclerosis                              |                     |
| N87 | Parkinsonism                                    |                     |
| N88 | Epilepsy                                        |                     |
| N89 | Migraine                                        | Migraine            |
| N90 | Cluster headache                                | Migraine            |
| N92 | Trigeminal neuralgia                            | Migraine            |
| N93 | Carpal tunnel syndrome                          |                     |
| N94 | Peripheral neuritis neuropathy                  |                     |
| P15 | Chronic alcohol abuse                           |                     |
| P70 | Dementia                                        |                     |
| P71 | Organic psychosis other                         |                     |
| P72 | Schizophrenia                                   |                     |
| P73 | Affective psychosis                             |                     |
| P74 | Anxiety disorder/anxiety state                  | Anxiety disorders   |
| P75 | Somatisation disorder                           |                     |
| P76 | Depressive disorder                             |                     |
| P78 | Neuraesthesia surmenage                         |                     |
| P79 | Phobia/compulsive disorder                      | Anxiety disorders   |
| P80 | Personality disorder                            |                     |
| P85 | Mental retardation                              |                     |
| P98 | Psychosis NOS other                             |                     |
| R84 | Malignant neoplasm bronchus/lung                | Cancer              |
| R85 | Malignant neoplasm respiratory, other           | Cancer              |
| R90 | Hypertrophy tonsils adenoids                    |                     |
| R91 | Chronic bronchitis                              | COPD                |
| R95 | Emphysema/chronic obstructive pulmonary disease | COPD                |
| R96 | Asthma                                          |                     |
| S77 | Malignant neoplasm of skin                      | Cancer              |
| S86 | Dermatitis seborrhoeic                          | Eczema              |
| S87 | Dermatitis/atopic eczema                        | Eczema              |
| S91 | Psoriasis                                       |                     |
| T06 | Anorexia nervosa bulimia                        |                     |

|     |                                        |        |
|-----|----------------------------------------|--------|
| T71 | Malignant neoplasm thyroid             | Cancer |
| T81 | Goitre                                 |        |
| T85 | Hyperthyroidism thyrotoxicosis         |        |
| T86 | Hypothyroidism myxoedema               |        |
| T90 | Diabetes                               |        |
| T92 | Gout                                   |        |
| T93 | Lipid disorder                         |        |
| U75 | Malignant neoplasm of kidney           | Cancer |
| U76 | Malignant neoplasm of kidney           | Cancer |
| U77 | Malignant neoplasm urinary other       | Cancer |
| U88 | Glomerulonephritis nephrosis           |        |
| W15 | Infertility/ subfertility              |        |
| W72 | Malignant neoplasm relate to pregnancy | Cancer |
| X74 | Pelvic inflammatory disease            |        |
| X75 | Malignant neoplasm cervix              | Cancer |
| X76 | Malignant neoplasm breast female       | Cancer |
| X77 | Malignant neoplasm genital other (f)   | Cancer |
| Y78 | Fibromyoma uterus                      | Cancer |
| Y85 | Benign prostatic hypertrophy           |        |

---

ICPC: the International Classification of Primary Care.

*Supplement 2.* Overview of ICPC codes that were combined to clusters.

| Disease Cluster        | ICPC codes                                                                                     |
|------------------------|------------------------------------------------------------------------------------------------|
| Anaemia                | B81 B82                                                                                        |
| Cancer                 | A79 B72 B73 D74 D75 D76 D77 L71 N74 R84 R85 S77 T71 U75 U76 U77<br>W72 X75 X76 X77 Y77 Y78 B74 |
| Congenital diseases    | A90 D84 K73 N76 N85                                                                            |
| Ulcer                  | D85 D86                                                                                        |
| Visual impairment      | F83 F84 F92 F93 F94                                                                            |
| Hearing impairment     | H84 H85 H86                                                                                    |
| Ischaemic hart disease | K74 K75 K76                                                                                    |
| Hypertension           | K86 K87                                                                                        |
| Stroke                 | K89 K90                                                                                        |
| Spinal cord            | L83 L84 L85 L86                                                                                |
| Osteoarthritis         | L89 L90 L91                                                                                    |
| Migraine               | N89 N90 N92                                                                                    |
| Anxiety disorders      | P74 P79                                                                                        |
| COPD                   | R91 R95                                                                                        |
| Eczema                 | S87 S86                                                                                        |

ICPC: the International Classification of Primary Care.
